# Supplementary material for: Safe femoral condyle range for the reverse Rigidfix femoral fixation device in anterior cruciate ligament reconstruction
Source: BMC Musculoskelet Disord. 2022 Mar 25;23:288. doi: 10.1186/s12891-022-05250-8 (PMC8951699; doi:10.1186/s12891-022-05250-8)
Supplement: Supplementary file 2 — Additional file 2. [file 12891_2022_5250_MOESM2_ESM.xlsx]

## Sheet: Sheet1
Patient Number	Gender	Age	The mediolateral diameter of the femoral condyle	Cross-pin angle	Femoral tunnel angle	The anteroposterior diameter of the lateral femoral condyle	Group
1816851	F	40	62.32	25.88	76.94	53.11	1
1809386	F	26	62.83	32.37	86.38	54.54	1
1818465	F	47	65.9	24.88	82.86	50.88	1
1810545	F	42	67.02	43.71	82.28	56.02	1
1819679	F	27	67.26	42.63	75.86	59.63	1
1817014	F	39	67.38	34.98	79.34	56.8	1
1825198	F	30	67.69	26.91	85.69	56.5	1
1822805	F	17	67.98	30.01	86.39	57.6	1
1817371	F	47	68.21	39.68	85.03	59.64	1
1819131	F	47	68.39	28.01	76.22	52.45	1
1813801	F	17	68.55	22.21	81.15	59.83	1
1824103	F	20	68.76	29.05	96.62	61.68	1
1825127	F	14	68.82	26.25	88.81	56.5	1
1820260	F	39	68.83	46	79.52	52.81	1
1816309	F	50	69.07	16.33	84.48	53.66	1
1808543	F	23	69.11	31.31	82.51	59.48	1
1723222	F	47	69.18	24.67	78.82	55.47	1
1821241	F	18	69.2	22.12	75.56	54.95	1
1806813	F	27	69.26	29.65	88.46	60.87	1
1801244	F	21	69.33	51.39	98.82	57.42	1
1823397	F	29	69.43	28.96	88.48	58.72	1
1806422	F	38	69.47	12.19	74.89	59.77	1
1813539	F	20	69.59	36.34	87.69	60.17	1
1809116	F	52	69.87	31.22	91.74	55.28	1
1809816	F	53	69.92	32.37	92.49	58.34	1
1802023	F	49	70.01	24.29	75.18	57.01	1
1824574	F	19	70.06	59.57	79.96	55.46	1
1810324	F	18	70.48	34.97	85.32	62.13	0
1819638	F	43	70.55	32.62	73.11	56.13	1
1820265	F	24	70.8	21.85	78.15	62.59	1
1819645	F	34	70.81	22.85	74.68	59.08	1
1814618	F	47	70.88	32.05	83.54	58.13	1
1809810	F	39	70.95	29.84	80.25	59.06	1
1824948	F	25	70.99	19.8	74.39	60.47	1
1813719	F	45	71.3	34.85	83.82	54.32	1
1811294	F	43	71.35	30.52	84.5	59.09	1
1812095	F	19	71.37	29.44	73.37	63.36	1
1811498	F	20	71.39	30.64	87.95	61.87	1
1816691	F	43	71.39	21.48	88.01	56.1	1
1813686	F	23	71.53	22.89	73.69	59.51	1
1808808	F	32	71.59	41.68	75.2	62.12	1
1823155	F	18	71.59	28.19	76.29	56.58	1
1809896	F	22	71.67	21.22	82.13	59.53	1
1811652	F	25	71.81	23.28	76.44	60.21	1
1802263	F	36	71.89	46.75	82.5	57.93	1
1806296	F	26	72	47.6	83.34	57.84	1
1818568	F	37	72.04	27.91	86.43	57.66	1
1801658	F	25	72.08	34.86	88.12	60.26	1
1806062	F	48	72.13	44.55	76.68	60.69	1
1820263	F	48	72.18	15.91	66.25	60.39	0
1802273	F	25	72.3	38.98	87.75	56.54	1
1807819	F	24	72.39	27.01	82.73	56.68	1
1811348	M	28	72.53	37.92	80.36	61.07	1
1802066	F	14	72.54	41.44	75.27	56.99	1
1812465	F	39	72.63	22.07	83.48	58.03	1
1813529	F	16	72.92	45.7	90.3	58.62	1
1818541	F	24	72.98	24.44	82.16	61.55	1
1820525	F	19	73.16	37.64	72.79	65.04	1
1805942	F	37	73.39	38.03	91.07	55.73	1
1817191	F	35	73.43	29.1	79.62	60.15	1
1823958	F	47	73.74	25.5	74.55	60.75	1
1819628	F	18	74.02	22.57	81.58	61.79	1
1822373	F	24	74.12	26.41	78.19	62.68	1
1800689	F	24	74.29	24.27	72.97	62.93	0
1824690	F	21	74.4	40.73	82.07	60.69	1
1822535	F	46	74.54	23.16	85.13	58.31	1
1814396	F	15	74.78	28.08	89.09	62.39	0
1822900	F	42	75.19	29.58	82.35	61.9	1
1808398	M	29	75.6	32.08	93.65	62.66	0
1801447	F	19	75.62	28.81	81.23	65.07	0
1821078	F	27	75.67	22.26	82.57	64.72	0
1822976	F	43	75.77	41.4	81.89	67.18	0
1810241	F	46	75.87	32.09	88.82	59.53	0
1823637	F	50	76.07	38.16	86.3	60.62	0
1802380	M	25	76.15	38.61	84.46	61.3	0
1800952	F	25	76.18	31.64	78.07	61.99	0
1814939	M	17	76.33	19.19	85.64	64.32	0
1818273	M	28	76.5	34.41	85.02	60.23	0
1800685	F	36	76.68	44.02	86.39	60.94	0
1807557	M	28	76.72	15.92	77.27	61.43	0
1822317	M	24	76.74	30.91	74.11	65.66	0
1802543	F	16	76.8	31.32	85.25	60.76	0
1807258	F	25	76.85	19.94	80.93	61.31	0
1824524	M	43	76.87	28.1	78.5	64.48	0
1820249	F	21	76.92	23.66	84.58	66.08	0
1813695	M	16	77.11	31.05	75.57	63.93	0
1806705	F	45	77.15	24.44	72.93	59.52	0
1810122	F	52	77.24	28.35	77.67	64.87	0
1823738	M	44	77.35	19.46	84.29	59.53	0
1806293	M	18	77.36	49.65	87.71	62.85	0
1814709	M	32	77.51	36.11	87.23	60.89	0
1806148	M	43	77.56	21.04	101.6	62.37	0
1813157	M	23	77.6	26.5	81.87	64.37	0
1814075	M	35	77.65	30.32	89.07	64.4	0
1819136	M	22	77.76	36.19	85.67	62.41	0
1811188	M	30	77.92	48.33	97.52	62.18	0
1815987	M	46	77.94	22.31	74.41	65.46	0
1811061	M	18	77.98	24.4	81.9	61.91	0
1817322	M	14	78.23	27.45	76.96	64.71	0
1815092	M	43	78.33	19.62	82.69	61.58	0
1805701	M	24	78.51	41.65	96.58	61.74	0
1811878	M	18	78.53	28.88	76.62	64.08	0
1805222	M	51	78.62	23.2	74.24	64.51	0
1820409	M	31	78.87	27.76	79.3	66.57	0
1808164	M	38	78.9	34.09	108.14	66.82	0
1806271	M	57	78.92	21.41	79.69	60.28	0
1821928	M	27	78.97	29.74	86.2	64.13	0
1820257	M	20	79.07	34.83	90.32	65.7	0
1816955	F	16	79.08	28.84	86.03	65.83	0
1808998	F	18	79.14	26.85	81.19	64.07	0
1806808	M	43	79.26	29.69	82.53	63.96	0
1815984	M	39	79.33	25.29	71.05	67.61	0
1812292	M	23	79.38	35.08	85.49	64.18	0
1821250	M	27	79.51	41.85	73.21	65.1	0
1809004	F	27	79.62	31.03	79.73	63.68	0
1820965	M	18	79.62	20.51	85.04	62.57	0
1815022	M	44	79.67	25.34	81.22	68.43	0
1823591	M	33	79.67	27.15	83.11	61.88	0
1818711	M	28	79.73	38.32	90	65.61	0
1822813	M	32	80.03	33.76	77.83	60.92	0
1812107	M	20	80.04	23.96	81.28	62.57	0
1802038	M	48	80.05	27.9	79.9	66.69	0
1801060	M	27	80.2	37.59	96.06	62.29	0
1802558	M	30	80.25	29.74	78.96	63.03	0
1819132	M	32	80.39	21.46	83.68	69.85	0
1814947	M	35	80.59	30.26	84.48	68.12	0
1813252	M	26	80.65	20.77	80.96	65.38	0
1807265	M	31	80.66	32.24	77.9	67.68	0
1822707	M	17	80.67	14.48	78.86	63.46	0
1814837	M	42	80.78	38.05	85.83	66.04	0
1815758	M	21	80.98	45.26	83.43	64.5	0
1824470	M	31	80.98	25.42	78.05	67.78	0
1823417	M	31	80.99	33.26	69.49	64.09	0
1820168	M	26	81.09	21.63	78.57	67.57	0
1821093	M	29	81.15	27.51	72.98	65.51	0
1813250	M	43	81.26	25.01	83.65	68.09	0
1801451	M	17	81.34	34.53	78.52	64.91	0
1819006	M	23	81.42	29.55	83.9	69.61	0
1816834	M	21	81.51	36.06	84.73	63.47	0
1818708	M	35	81.51	49.64	86.06	64.73	0
1815246	M	28	81.53	21.36	82.2	62.85	0
1825501	M	19	81.55	41.38	88.43	66.94	0
1825040	M	31	81.56	25.73	95.27	63.74	0
1823496	M	35	81.58	23.04	81.42	63.9	0
1807882	M	32	81.6	26.41	84.36	67.03	0
1814220	M	28	81.64	37.73	87.61	63.79	0
1820723	M	26	81.68	27.94	77.84	66.4	0
1814916	M	19	81.7	21.61	79.23	67.55	0
1810045	M	25	81.73	34.36	83.21	66.32	0
1815242	M	28	81.77	42.45	79.56	68.44	0
1824491	M	16	81.79	37.67	97.39	61.96	0
1822718	M	33	81.89	30.66	83.6	69.2	0
1825570	M	46	81.89	11.7	71.59	64.53	0
1809600	M	36	81.9	31.34	72.57	62.83	0
1808268	M	45	82.06	46.02	92.93	69.46	0
1723312	M	24	82.07	44.62	83.64	66.34	0
1818553	M	33	82.08	27.92	80.4	66.6	0
1813416	M	37	82.11	29.34	71.7	66.15	0
1816814	M	33	82.18	28.58	84.07	67.36	0
1819013	M	35	82.18	23.03	77.12	64.76	0
1824668	M	22	82.29	38.44	76.63	66.61	0
1810239	M	41	82.34	27.62	81.08	61.95	0
1821908	M	18	82.38	27.84	65.82	69.23	0
1818649	M	27	82.45	29.27	87.22	63.96	0
1723037	M	23	82.46	59.02	79.74	65.7	0
1813527	M	17	82.46	37.22	84.71	70.26	0
1820684	M	18	82.46	38.65	89.19	62.84	0
1812592	M	20	82.47	31.12	86.87	68.45	0
1823629	M	28	82.57	22.87	87.74	65.73	0
1800081	M	38	82.61	35.1	84.17	61.15	0
1818425	M	25	82.72	30.41	95.31	67.55	0
1812206	M	26	82.85	25.42	76.98	65.03	0
1812294	M	32	82.85	30.34	75.77	67.31	0
1807127	M	23	82.87	24.06	84.36	67.74	0
1818087	M	31	82.87	18.96	83.12	69.36	0
1801594	M	35	82.88	39.41	90.82	63.63	0
1801455	M	20	82.97	31.11	72.57	63.43	0
1805306	M	21	82.99	25.4	81.64	66.23	0
1821091	M	31	83	30.4	82.07	63.41	0
1812199	M	28	83.03	30.31	92.51	65.78	0
1809602	M	23	83.04	26.7	67.88	67.49	0
1810881	M	43	83.05	36.89	79.19	65.41	0
1812962	M	35	83.06	28.29	82.46	64.22	0
1818278	M	30	83.07	38.19	93.06	67.47	0
1809915	M	29	83.09	43.25	77.78	69.45	0
1805332	M	35	83.2	24.15	67.41	66.5	0
1816300	M	29	83.2	32.41	88.54	67.66	0
1800855	M	49	83.21	19.57	83.46	68.53	0
1821531	M	38	83.38	25.32	75.54	64.5	0
1808973	F	26	83.55	23.85	75.84	67.77	0
1819055	M	33	83.59	24.46	73.62	66.83	0
1805860	M	22	83.61	21.6	79.56	63.21	0
1822757	M	28	83.78	27.58	77.41	66.84	0
1814212	M	17	83.8	27.1	83.37	67.77	0
1810921	M	52	83.81	47.32	91.55	65.52	0
1821533	M	30	83.82	29.47	79.95	68.97	0
1808409	M	32	83.84	26.31	82.38	67.3	0
1816937	M	22	83.97	30.14	80.92	63.86	0
1808732	M	27	83.99	40.87	96.61	60.47	0
1811309	M	34	84.06	25.7	73.39	69.03	0
1823952	M	41	84.11	24.09	83.76	66.5	0
1809872	M	36	84.15	26.13	90.32	66.84	0
1821999	M	48	84.15	17.07	74.37	67.6	0
1823500	M	27	84.15	27.13	82.77	66.13	0
1808123	M	31	84.17	46.42	99.97	65.13	0
1822371	M	17	84.17	27.94	77.14	65.44	0
1820522	M	30	84.19	33.33	77.81	69.13	0
1807125	M	17	84.2	48.96	91.76	67.92	0
1811976	M	37	84.22	27.74	78.52	63.85	0
1819851	M	27	84.22	35.72	84.45	68.22	0
1811316	M	43	84.27	36.98	97.94	66.01	0
1801071	M	23	84.36	44.81	84.98	61.92	0
1801944	M	19	84.42	21.2	83.28	66.98	0
1809596	M	27	84.49	27.34	86.54	63.75	0
1810060	M	16	84.56	26.72	76.02	72.45	0
1822712	M	32	84.6	24.47	91.88	70.78	0
1802562	M	28	84.68	30.71	83.7	65.95	0
1822808	M	40	84.84	22.43	83.89	65.07	0
1812373	M	38	84.91	35.66	78.32	67.19	0
1822384	M	49	84.92	44.04	78.78	71.36	0
1801930	M	26	85.05	29.47	78.33	67.52	0
1821545	M	39	85.1	43.43	89.85	66.27	0
1810675	M	17	85.13	22.03	78.08	67.69	0
1810141	M	41	85.24	27.17	71.42	66.1	0
1811231	M	29	85.34	27.48	82.3	63.72	0
1815370	M	36	85.65	45.92	81.92	68.34	0
1815556	M	19	85.65	30.92	85.62	65.51	0
1723128	M	23	85.67	20.9	80.58	69.09	0
1800209	M	28	85.72	29.96	81.38	65.02	0
1821929	M	25	85.83	36.92	81.52	68.17	0
1815799	M	25	85.84	44.09	92.73	71.37	0
1802277	M	35	85.97	31.04	85.76	72.09	0
1822369	M	23	86.03	43.18	86.68	72.32	0
1812825	M	39	86.12	38.45	82.4	68.45	0
1815898	M	21	86.21	30.62	91.03	66.49	0
1822090	M	32	86.27	28.39	78.39	63.02	0
1814495	M	29	86.29	40.85	87.38	68.6	0
1820403	M	20	86.32	32.62	83.69	70.16	0
1824974	M	40	86.33	28.9	83.75	70.62	0
1824402	M	36	86.59	31.07	80.7	75.18	0
1805877	M	25	86.65	37.76	77.9	68.18	0
1807810	M	21	86.69	38.22	93.75	66.45	0
1807729	M	28	86.7	30.36	79.56	67.28	0
1823756	M	32	86.78	27.15	90.27	68.45	0
1822306	M	30	86.79	50.18	104.47	70.01	0
1824384	M	38	86.83	36.17	94.35	71.13	0
1822702	M	16	86.84	12.77	86.36	66.43	0
1813458	M	30	87.22	34.12	89	68.59	0
1823141	M	22	87.38	25.91	84.48	67.53	0
1822979	M	24	87.42	15.84	80.65	71.57	0
1810306	M	25	87.46	29.53	82.51	68.37	0
1821844	M	33	87.76	29.2	76.95	67.77	0
1819583	M	49	87.94	22.28	73.11	72.64	0
1816139	M	21	88.09	32.16	79.88	67.27	0
1800988	M	31	88.11	28.77	79.3	72.66	0
1815021	M	30	88.12	32.77	87.04	68.74	0
1806533	M	17	88.14	22.16	83.81	68.58	0
1824386	M	18	88.49	37.75	81.85	68.27	0
1800160	M	35	88.54	37.19	81.43	67.32	0
1809809	M	20	88.72	22.75	86.08	71.85	0
1805431	M	29	88.74	33.87	85.87	73.02	0
1818079	M	26	88.99	41.61	74.26	71.76	0
1825058	M	33	89.01	24.08	79.31	75.96	0
1802254	M	32	89.21	46.71	95.47	72.46	0
1814684	M	27	89.55	25.39	73.47	72.81	0
1806259	M	19	89.99	32.15	85.7	69.23	0
1820773	M	19	90.36	40.14	76.55	72.53	0
1808153	M	22	90.43	21.38	85.73	70	0
1802389	M	26	90.61	23.93	84.3	74.81	0
1819255	M	41	91.34	26.47	78.92	74.74	0
1824940	M	18	91.43	29.31	79.23	72.56	0
1807519	M	18	91.78	39.99	87.6	70.13	0
1816072	M	20	92.38	21.5	98.59	78.18	0
1810142	M	32	92.45	23.33	70.29	72.67	0
1808642	M	20	92.47	16.65	75.43	75.36	0
1801310	M	19	93.92	37.67	81.01	73.03	0
